# Supplementary material
Source: publisher figshare collection journal article supplement (https://acs.figshare.com/ndownloader/files/4604104)
Supplement: Supplementary file 1 [file 4604104]

*Supporting Information for:*

## **Sequence- and Chain Length-Specific Complementary Double Helix Formation**

Hiroshi Ito,<sup>†</sup> Yoshio Furusho,<sup>\*,†,‡</sup> Toshihide Hasegawa,<sup>†</sup> and Eiji Yashima<sup>\*,†,‡</sup>

<sup>†</sup> Yashima Super-structured Helix Project, Exploratory Research for Advanced Technology (ERATO), Japan Science and Technology Agency (JST), Japan. <sup>‡</sup> Graduate School of Engineering, Nagoya University, Nagoya 464-8603, Japan.

E-mail: furusho@apchem.nagoya-u.ac.jp (Y.F.); yashima@apchem.nagoya-u.ac.jp (E.Y.).

## Experimental Section

**Materials.** All starting materials and dehydrated solvents were purchased from Aldrich, Wako Pure Chemical Industries (Osaka, Japan), and Tokyo Chemical Industry (Tokyo, Japan) unless otherwise noted.  $\text{CDCl}_3$  (99.8 atom %D) and  $\text{THF-}d_8$  (99.95 atom %D) were purchased from Cambridge Isotope Laboratories (Andover, MA, USA). Silica gel ( $\text{SiO}_2$ ) and aminopropyl-modified silica gel ( $\text{NH}_2\text{-SiO}_2$ ) for the flash chromatography were purchased from Merck and Fuji Silysia Chemical Ltd. (Kasugai, Japan), respectively. Bio-Beads SX-3 for the SEC was purchased from Bio-Rad Laboratories. Compounds **A-H**,<sup>1</sup> **H-A-H**,<sup>2</sup> **AA**,<sup>1</sup> **C-H**,<sup>3</sup> and **H-C-H**<sup>3</sup> were prepared according to the previously reported methods.

**Instruments.** The melting points were measured using a Yanaco MP-500D melting point apparatus (Kyoto, Japan) and were uncorrected. The NMR spectra were obtained using a Varian UNITY INOVA 500AS spectrometer operating at 500 MHz for  $^1\text{H}$  and 125 MHz for  $^{13}\text{C}$ . Chemical shifts are reported in parts per million ( $\delta$ ) downfield from tetramethylsilane (TMS) as the internal standard in  $\text{CDCl}_3$  and from the residual proton peaks in  $\text{THF-}d_8$  as the internal standard in  $\text{THF-}d_8$ . The ESI-MS were recorded on a JEOL JMS-T100CS spectrometer (Akishima, Japan). The elemental analyses were performed by the laboratory of elemental analyses in the Department of Agriculture, Nagoya University. The IR spectra were recorded using a JASCO Fourier Transform IR-680 spectrophotometer (Hachioji, Japan). The absorption and CD spectra were measured in a 1.0- or 10-mm quartz cell on a JASCO V-570 spectrophotometer and a JASCO J-820 spectropolarimeter, respectively. The temperature was controlled by a JASCO PTC-423L apparatus. The optical rotations were taken using a JASCO P-1030 polarimeter in  $\text{CDCl}_3$  in a 2-cm quartz cell equipped with a temperature controller (EYELA NCB-2100). The HPLC measurements for the sequence-specific double helix formation were

performed with a JASCO PU-2080 liquid chromatograph (Hachioji, Japan) equipped with a UV-visible (328 nm; JASCO UV-2070) detector and a TSKgel Silica-60 column (Tosoh, Tokyo, Japan,  $\phi 0.46 \times 25$  cm) using hexane/ $\text{CHCl}_3$  as the eluent at a flow rate of 1.0 mL/min. The SEC analyses for the chain length-specific double helix formation were performed using an LC-928R liquid chromatograph (Japan Analytical Industry, Tokyo) equipped with two SEC columns (JALGEL-1H ( $1 \times 60$  cm) and JALGEL-2H ( $1 \times 60$  cm)) in series and a UV-visible detector (254 nm, JAI UV-310).  $\text{CHCl}_3$  was used as the eluent at a flow rate of 3.8 mL/min. All the reactions were monitored by TLC.

### Synthetic Procedures.

**AC.** CuI (1.9 mg, 10  $\mu\text{mol}$ ) was added to a solution of **A-H**<sup>1</sup> (60 mg, 0.10 mmol), **C-H**<sup>3</sup> (50 mg, 0.10 mmol), and  $(\text{Ph}_3\text{P})_2\text{PdCl}_2$  (7.9 mg, 11  $\mu\text{mol}$ ) in  $\text{CHCl}_3$ - $\text{Et}_3\text{N}$  (10/1 (v/v), 2.2 mL). After the mixture was stirred at room temperature for 21 h, the solvent was evaporated to dryness. The residue was purified by column chromatography ( $\text{SiO}_2$ ,  $\text{CHCl}_3/\text{MeOH} = 100/0$  to  $100/20$  (v/v)), SEC (Bio-Beads S-X3,  $\text{CHCl}_3$ ), and column chromatography ( $\text{NH}_2\text{-SiO}_2$ ,  $\text{CHCl}_3/\text{hexane} = 1/2$  to  $1/0$  (v/v)) to afford **AC** (38 mg, 34% yield) as a white solid.  $[\alpha]_{\text{D}}^{20} -714$  ( $c = 0.1$  in  $\text{CHCl}_3$ );  $^1\text{H}$  NMR (500 MHz,  $\text{CDCl}_3$ , 25 °C, as **(AC)**<sub>2</sub>)  $\delta$  13.39 (d,  $J = 9.0$  Hz, 1H, NH), 13.36 (d,  $J = 8.9$  Hz, 1H, NH), 7.73 (d,  $J = 8.5$  Hz, 2H, ArH), 7.70 (t,  $J = 7.8$  Hz, 1H, ArH), 7.66 (d,  $J = 8.4$  Hz, 2H, ArH), 7.62 (d,  $J = 8.5$  Hz, 2H, ArH), 7.61 (d,  $J = 8.4$  Hz, 2H, ArH), 7.48–7.35 (m, 8H, ArH), 7.23 (t,  $J = 7.4$  Hz, 1H, ArH), 7.19–7.12 (m, 3H, ArH), 7.07 (t,  $J = 7.7$  Hz, 2H, ArH), 6.77–6.69 (m, 4H, ArH), 6.60 (d,  $J = 8.3$  Hz, 2H, ArH), 6.55 (d,  $J = 8.2$  Hz, ArH, 2H), 3.84–3.72 (m, 2H,  $\text{CH}_3\text{CHN}$ ), 2.39 (t,  $J = 7.2$  Hz, 2H, octynyl), 1.64–1.56 (m, 2H, octynyl), 1.48–1.40 (m, 2H, octynyl), 1.36–1.26 (m, 4H, octynyl), 0.90 (t,  $J = 7.0$  Hz, 3H, octynyl), 0.70 (d,  $J = 6.8$  Hz, 3H,  $\text{CH}_3\text{CHN}$ ), 0.59 (d,  $J = 6.8$  Hz, 3H,  $\text{CH}_3\text{CHN}$ ), 0.31 (s, 9H,  $\text{SiCH}_3$ ), 0.27 (s, 9H,  $\text{SiCH}_3$ );  $^{13}\text{C}$  NMR (125 MHz,  $\text{CDCl}_3$ , 25 °C)  $\delta$  176.59, 162.05, 142.81, 142.50, 142.34, 141.70, 141.38,

141.14, 140.50, 138.45, 138.02, 137.15, 136.81, 132.65, 132.09, 132.02, 131.61, 131.58, 131.50, 131.34, 130.47, 130.21, 130.07, 129.83, 129.15, 129.11, 129.09, 129.06, 128.97, 128.93, 128.92, 128.64, 128.52, 105.78, 104.08, 96.37, 94.57, 90.28, 82.52, 80.40, 80.14, 76.32, 74.64, 55.52, 55.49, 31.35, 28.71, 28.63, 22.71, 22.53, 22.52, 19.47, 14.05, 0.23, -0.01; IR (KBr,  $\text{cm}^{-1}$ ): 3415 ( $\nu_{\text{N-H}}$ ,  $\nu_{\text{O-H}}$ ), 2156 ( $\nu_{\text{C}\equiv\text{C}}$ ), 1656 ( $\nu_{\text{C=O}}$ ,  $\nu_{\text{C=N}}$ ); HRMS(ESI):  $m/z$  calcd for  $[\text{M}(\text{C}_{76}\text{H}_{72}\text{N}_2\text{O}_2\text{Si}_2)+\text{H}]^+$ , 1101.5211; found 1101.5168; Anal. Calcd for  $\text{C}_{76}\text{H}_{72}\text{N}_2\text{O}_2\text{Si}_2$ : C, 82.86; H, 6.59; N, 2.54. Found: C, 82.61; H, 6.50; N, 2.47.

**AA-H.** To a stirred solution of **AA**<sup>1</sup> (1.29 g, 1.08 mmol) in THF (50 mL) was added dropwise a solution of TBAF in THF (0.015 M, 1.3 mL, 0.0195 mmol) at ambient temperature over a period of 2.5 h. After 1M HCl (4 mL) was added, the reaction mixture was evaporated to dryness. The residue was dissolved in  $\text{CHCl}_3$  (50 mL), and the resultant solution was washed with brine (25 mL), dried over  $\text{Na}_2\text{SO}_4$ , filtered, and evaporated to dryness. The residue was purified by column chromatography ( $\text{NH-SiO}_2$ , hexane/EtOAc = 20/1 to 0/1 (v/v)) to afford **AA-H** as a white solid in 25% yield. This was used in the next step without further purification.  $^1\text{H}$  NMR (500 MHz,  $\text{CDCl}_3$ , 25 °C, as **AA-H**·( $\text{CH}_3\text{CO}_2\text{H}$ )<sub>2</sub>)  $\delta$  12.75 (br s, 4H, NH), 7.81–7.75 (m, 2H, ArH), 7.55–7.50 (m, 4H, ArH), 7.33–7.20 (m, 20H, ArH), 7.06–6.99 (m, 8H, ArH), 6.72–6.63 (m, 8H, ArH), 3.96–3.88 (m, 4H, CHN), 3.12 (s, 1H,  $\text{C}\equiv\text{CH}$ ), 2.10 (s, 6H,  $\text{CH}_3\text{CO}$ ), 0.75–0.67 (m, 12H,  $\text{CH}_3\text{CHN}$ ), 0.25 (s, 9H,  $\text{SiCH}_3$ ).

**CC.** CuI (21 mg, 0.112 mmol) was added to a solution of **C-H**<sup>3</sup> (1.13 g, 2.25 mmol) and  $(\text{Ph}_3\text{P})_2\text{PdCl}_2$  (79 mg, 0.112 mmol) in  $\text{Et}_3\text{N}$  3.0 mL) and THF (30 mL). After the mixture was stirred at ambient temperature for 3 h, the solvent was evaporated to dryness. The residue was dissolved in EtOAc (200 mL), and the resultant solution was washed with 1 M HCl ( $2 \times 100$  mL), dried over  $\text{MgSO}_4$ , filtered,

and evaporated to dryness. The residue was purified by column chromatography (SiO<sub>2</sub>, hexane/EtOAc = 1/0 to 3/2 (v/v)) to afford **CC** in 84% yield as a white solid. M.p. = 138–140 °C. <sup>1</sup>H NMR (500 MHz, CDCl<sub>3</sub>, 25 °C) δ 7.61–7.52 (m, 8H, ArH), 7.38–7.24 (m, 12H, ArH), 2.40 (t, *J* = 7.1 Hz, 4H, CH<sub>2</sub>C≡C), 1.64–1.54 (m, 4H, CH<sub>2</sub>), 1.48–1.39 (m, 4H, CH<sub>2</sub>), 1.36–1.25 (m, 8H, CH<sub>2</sub>), 0.89 (t, *J* = 7.0 Hz, 6H, octynyl), 0.29 (s, 18H, SiCH<sub>3</sub>). Anal. Calcd for C<sub>68</sub>H<sub>66</sub>O<sub>4</sub>Si<sub>2</sub>: C, 81.39; H, 6.63. Found: C, 81.30; H, 6.48.

**CC-H.** To a stirred solution of **CC** (946 mg, 0.942 mmol) in THF (40 mL) was added dropwise a solution of TBAF in THF (0.16 M, 5.31 mL, 0.85 mmol) at ambient temperature over a period of 5.5 h. After 1M HCl (8 mL) was added, the reaction mixture was evaporated to dryness. The residue was dissolved in CHCl<sub>3</sub> (50 mL), and the resultant solution was washed with brine (25 mL), dried over MgSO<sub>4</sub>, filtered, and evaporated to dryness. The residue was purified by flash column chromatography (SiO<sub>2</sub>, hexane/EtOAc = 1/0 to 6/4 (v/v)) to afford **CC-H** as an off-white solid in 20% yield. This was used in the next step without further purification. <sup>1</sup>H NMR (500 MHz, CDCl<sub>3</sub>, 25 °C) δ 7.64–7.52 (m, 8H, ArH), 7.40–7.24 (m, 12H, ArH), 3.22 (s, 1H, C≡CH), 2.40 (t, *J* = 7.1 Hz, 4H, CH<sub>2</sub>C≡C), 1.63–1.55 (m, 4H, CH<sub>2</sub>), 1.48–1.39 (m, 4H, CH<sub>2</sub>), 1.36–1.24 (m, 8H, CH<sub>2</sub>), 0.89 (t, *J* = 7.0 Hz, 6H, octynyl), 0.29 (s, 9H, SiCH<sub>3</sub>).

**AAA.** CuI (0.57 mg, 3.0 μmol) was added to a solution of **AA-H** (34 mg, 30 μmol), **A-H**<sup>1</sup> (54 mg, 90 μmol), and (Ph<sub>3</sub>P)<sub>2</sub>PdCl<sub>2</sub> (2.1 mg, 3 μmol) in CHCl<sub>3</sub>-Et<sub>3</sub>N (10/1 (v/v), 13 mL). After the mixture was stirred at room temperature for 2 h, the solvent was evaporated to dryness. The residue was purified by column chromatography (NH<sub>2</sub>-SiO<sub>2</sub>, hexane/EtOAc = 20/1 to 4/1 (v/v)) and SEC (Bio-Beads S-X3, CHCl<sub>3</sub>) to afford **AAA** (27 mg, 52% yield) as a white solid. [ $\alpha$ ]<sub>D</sub><sup>20</sup> –228 (*c* = 0.1 in CHCl<sub>3</sub>); <sup>1</sup>H NMR

(500 MHz, CDCl<sub>3</sub>, 25 °C, as **AAA**·(CH<sub>3</sub>CO<sub>2</sub>H)<sub>3</sub>) δ 13.48 (br s, 6H, NH), 7.80–7.72 (m, 3H, ArH), 7.55–7.48 (m, 6H, ArH), 7.31–7.20 (m, 30H, ArH), 7.09–7.03 (m, 12H, ArH), 6.73–6.69 (m, 8H, ArH), 6.69–6.65 (m, 4H, ArH), 3.94–3.87 (m, 6H, CH<sub>3</sub>CHN), 2.12 (s, 9H, CH<sub>3</sub>CO<sub>2</sub>), 0.76–0.69 (m, 18H, CH<sub>3</sub>CHN), 0.26 (s, 18H, SiCH<sub>3</sub>); <sup>13</sup>C NMR (125 MHz, CDCl<sub>3</sub>, 25 °C, as **AAA**·(CH<sub>3</sub>CO<sub>2</sub>H)<sub>3</sub>) δ 178.82, 162.42, 162.37, 142.81, 142.72, 142.70, 141.64, 141.40, 141.31, 138.88, 138.80, 137.96, 132.80, 132.22, 131.91, 131.83, 130.71, 130.66, 130.46, 129.04, 129.00, 128.66, 128.41, 127.97, 127.94, 127.93, 126.56, 126.54, 123.33, 122.58, 122.56, 121.86, 121.80, 104.16, 96.05, 81.39, 81.35, 75.31, 75.28, 55.46, 55.43, 55.41, 24.01, 23.99, 22.23, –0.12; IR (KBr, cm<sup>–1</sup>): 3428 (ν<sub>N–H</sub>), 2156 (ν<sub>C≡C</sub>), 1637 (ν<sub>C=N</sub>); ESI-MS: *m/z* calcd for [M(C<sub>123</sub>H<sub>108</sub>N<sub>6</sub>Si<sub>2</sub>)+2H]<sup>2+</sup>, 863.42; found 863.28, calcd for [M+H]<sup>+</sup>, 1725.83; found 1725.83; HRMS(ESI): *m/z* calcd for [M+H]<sup>+</sup>, 1725.8252; found 1725.8251; Anal. Calcd for C<sub>123</sub>H<sub>108</sub>N<sub>6</sub>Si<sub>2</sub>: C, 85.57; H, 6.31; N, 4.87. Found: C, 85.50; H, 6.18; N, 4.69.

**AAC**. CuI (0.95 mg, 5.0 μmol) was added to a solution of **AA**-H (56 mg, 50 μmol), **C**-H<sup>3</sup> (37 mg, 74 μmol), and (Ph<sub>3</sub>P)<sub>2</sub>PdCl<sub>2</sub> (3.9 mg, 5.6 μmol) in CHCl<sub>3</sub>-Et<sub>3</sub>N (20/1 (v/v), 4 mL). After the mixture was stirred at room temperature for 11 h, the solvent was evaporated to dryness. The residue was purified by SEC (Bio-Beads S-X3, THF), column chromatography (SiO<sub>2</sub>, CHCl<sub>3</sub>/MeOH = 100/0 to 100/5 (v/v)), and SEC (Bio-Beads S-X3, CHCl<sub>3</sub>) to afford **AAC** (31 mg, 38% yield) as a white solid. [ $\alpha$ ]<sub>D</sub><sup>20</sup> –433 (*c* = 0.1 in CHCl<sub>3</sub>); <sup>1</sup>H NMR (500 MHz, CDCl<sub>3</sub>, 25 °C, as **AAC**·CH<sub>3</sub>COOH) δ 13.32 (d, *J* = 8.2 Hz, 2H, NH), 12.90 (br s, 2H, NH), 7.79–7.70 (m, 4H, ArH), 7.67 (d, *J* = 8.2 Hz, 2H, ArH), 7.62 (d, *J* = 8.3 Hz, 2H, ArH), 7.58 (d, *J* = 8.2 Hz, 2H, ArH), 7.53–7.50 (m, 2H, ArH), 7.49–7.36 (m, 8H, ArH), 7.34–7.14 (m, 14H, ArH), 7.08 (t, *J* = 7.8 Hz, 2H, ArH), 7.02 (t, *J* = 6.7 Hz, 4H, ArH), 6.79 (d, *J* = 7.4 Hz, 2H, ArH), 6.73 (d, *J* = 6.8 Hz, 2H, ArH), 6.69–6.64 (m, 4H, ArH), 6.61 (d, *J* = 8.2 Hz, 2H, ArH), 6.58 (d, *J* = 8.0 Hz, 2H, ArH), 3.95–3.87 (m, 2H, CH<sub>3</sub>CHN), 3.84–3.76 (m, 2H, CH<sub>3</sub>CHN), 2.39 (t, *J* = 7.1 Hz,

2H, octynyl), 2.10 (s, 3H, CH<sub>3</sub>COO), 1.64–1.56 (m, 2H, octynyl), 1.48–1.40 (m, 2H, octynyl), 1.36–1.24 (m, 4H, octynyl), 0.89 (t,  $J = 6.9$  Hz, 3H, octynyl), 0.74–0.68 (m, 9H, CH<sub>3</sub>CHN), 0.62 (d,  $J = 6.8$  Hz, 3H, CH<sub>3</sub>CHN), 0.36 (s, 9H, SiCH<sub>3</sub>), 0.25 (s, 9H, SiCH<sub>3</sub>); <sup>13</sup>C NMR (125 MHz, CDCl<sub>3</sub>, 25 °C, as AAC·CH<sub>3</sub>COOH)  $\delta$  176.87, 176.72, 162.46, 161.99, 142.70, 142.68, 142.51, 142.41, 142.30, 141.73, 141.67, 141.61, 141.29, 141.24, 141.09, 140.47, 138.86, 138.78, 138.37, 137.92, 137.17, 136.75, 132.78, 132.66, 132.23, 132.01, 131.88, 131.34, 130.69, 130.47, 130.29, 129.15, 129.05, 129.02, 128.98, 128.89, 128.75, 128.64, 128.40, 127.96, 126.53, 126.38, 126.33, 123.36, 122.66, 122.58, 122.50, 122.36, 121.95, 121.91, 121.80, 120.13, 105.48, 104.13, 96.09, 96.08, 94.74, 90.31, 82.56, 81.39, 81.26, 80.41, 80.12, 76.46, 75.74, 74.62, 55.56, 55.47, 31.35, 29.69, 28.72, 28.64, 22.63, 22.53, 22.44, 22.15, 22.11, 19.47, 14.05, 0.16, –0.12; IR (KBr, cm<sup>–1</sup>): 3433 ( $\nu_{\text{N-H}}$ ,  $\nu_{\text{O-H}}$ ), 2156 ( $\nu_{\text{C}\equiv\text{C}}$ ), 1638 ( $\nu_{\text{C}=\text{N}}$ ); ESI-MS:  $m/z$  calcd for [M(C<sub>115</sub>H<sub>102</sub>N<sub>4</sub>O<sub>2</sub>Si<sub>2</sub>)+2H]<sup>2+</sup>, 814.38; found 814.39, calcd for [M+H]<sup>+</sup>, 1627.76; found 1627.76; HRMS(ESI):  $m/z$  calcd for [M+H]<sup>+</sup>, 1627.7620; found 1627.7610; Anal. Calcd for C<sub>115</sub>H<sub>102</sub>N<sub>4</sub>O<sub>2</sub>Si<sub>2</sub>: C, 84.83; H, 6.31; N, 3.44. Found: C, 84.75; H, 6.19; N, 3.31.

**ACA.** CuI (4.8 mg, 25  $\mu$ mol) was added to a solution of **A-H**<sup>1</sup> (180 mg, 0.30 mmol), **H-C-H**<sup>3</sup> (43 mg, 0.10 mmol), and (Ph<sub>3</sub>P)<sub>2</sub>PdCl<sub>2</sub> (18 mg, 25  $\mu$ mol) in CHCl<sub>3</sub>-Et<sub>3</sub>N (10/1 (v/v), 11 mL). After the mixture was stirred at room temperature for 4 h, the solvent was evaporated to dryness. The residue was then dissolved in CHCl<sub>3</sub> (20 mL) and the solution was washed with 1 M HCl aq. (10 mL), water (10 mL), and brine (10 mL), successively, and dried over anhydrous Na<sub>2</sub>SO<sub>4</sub>. The residue was purified by SEC (Bio-Beads S-X3, THF), column chromatography (NH-SiO<sub>2</sub>, CHCl<sub>3</sub>/MeOH = 100/0 to 100/6 (v/v)), and SEC (Bio-Beads S-X3, CHCl<sub>3</sub>) to afford **ACA** (33 mg, 20% yield) as a white solid.  $[\alpha]_{\text{D}}^{20}$  –468 ( $c = 0.1$  in CHCl<sub>3</sub>); <sup>1</sup>H NMR (500 MHz, CDCl<sub>3</sub>, 25 °C, as **ACA**·(CF<sub>3</sub>COOH)<sub>2</sub>)  $\delta$  11.81–10.86 (br, 4H, NH), 7.81 (t,  $J = 7.5$  Hz, 2H, ArH), 7.58–7.51 (m, 8H, ArH), 7.43–7.37 (m, 6H, ArH), 7.25–7.22 (m,

20H, ArH), 7.00–6.94 (m, 8H, ArH), 6.66 (d,  $J = 8.3$  Hz, 4H, ArH), 6.63 (d,  $J = 7.4$  Hz, 4H, ArH), 4.00–3.89 (m, 4H,  $\text{CH}_3\text{CHN}$ ), 2.41 (t,  $J = 7.0$  Hz, 2H, octynyl), 1.64–1.54 (m, 2H, octynyl), 1.48–1.41 (m, 2H, octynyl), 1.36–1.24 (m, 4H, octynyl), 0.90 (t,  $J = 6.8$  Hz, 3H, octynyl), 0.71 (d,  $J = 6.7$  Hz, 12H,  $\text{CH}_3\text{CHN}$ ), 0.26 (s, 18H,  $\text{SiCH}_3$ );  $^{13}\text{C}$  NMR (125 MHz,  $\text{CDCl}_3$ , 25 °C, as  $\text{ACA} \cdot (\text{CF}_3\text{COOH})_2$ )  $\delta$  170.71, 163.02, 161.53, 161.23, 141.73, 141.48, 141.39, 141.37, 140.71, 139.80, 138.24, 137.43, 132.87, 132.59, 132.36, 132.06, 130.89, 130.64, 129.29, 129.27, 128.62, 128.53, 128.49, 128.28, 126.38, 126.35, 123.77, 122.44, 119.26, 116.97, 114.67, 103.77, 96.52, 93.28, 82.16, 80.61, 79.33, 75.91, 74.51, 55.79, 31.32, 29.69, 28.60, 28.52, 22.52, 21.88, 21.85, 19.44, 14.05, –0.16; IR (KBr,  $\text{cm}^{-1}$ ): 3435 ( $\nu_{\text{N-H}}$ ,  $\nu_{\text{O-H}}$ ), 2157 ( $\nu_{\text{C}\equiv\text{C}}$ ), 1645 ( $\nu_{\text{C=O}}$ ,  $\nu_{\text{C=N}}$ ); ESI-MS:  $m/z$  calcd for  $[\text{M}(\text{C}_{115}\text{H}_{102}\text{N}_4\text{O}_2\text{Si}_2)+2\text{H}]^{2+}$ , 814.38; found 814.35, calcd for  $[\text{M}+\text{H}]^+$ , 1627.76; found 1627.77; HRMS(ESI):  $m/z$  calcd for  $[\text{M}+\text{H}]^+$ , 1627.7620; found 1627.7657; Anal. Calcd for  $\text{C}_{115}\text{H}_{102}\text{N}_4\text{O}_2\text{Si}_2$ : C, 84.83; H, 6.31; N, 3.44. Found: C, 84.70; H, 6.15; N, 3.25.

**CAC.** CuI (1.5 mg, 8.0  $\mu\text{mol}$ ) was added to a solution of **C-H**<sup>3</sup> (101 mg, 0.20 mmol), **H-A-H**<sup>2</sup> (21 mg, 40  $\mu\text{mol}$ ), and  $(\text{Ph}_3\text{P})_2\text{PdCl}_2$  (5.6 mg, 8.0  $\mu\text{mol}$ ) in THF- $\text{Et}_3\text{N}$  (10/1 (v/v), 26 mL). After the mixture was stirred at room temperature for 16 h, the solvent was evaporated to dryness. The residue was then dissolved in  $\text{CHCl}_3$  (20 mL) and the solution was washed with 1 M HCl aq. (10 mL), water (10 mL), and brine (10 mL), successively, and dried over anhydrous  $\text{Na}_2\text{SO}_4$ . The residue was purified by column chromatography ( $\text{SiO}_2$ , hexane/THF = 20/3 to 1/1 (v/v)) and SEC (Bio-Beads S-X3,  $\text{CHCl}_3$ ) to afford **CAC** (10 mg, 17% yield) as a white solid.  $[\alpha]_{\text{D}}^{20}$  –358 ( $c = 0.1$  in  $\text{CHCl}_3$ );  $^1\text{H}$  NMR (500 MHz, THF- $d_8$ , 25 °C)  $\delta$  14.15–14.02 (m, 2H, NH), 7.79 (t,  $J = 7.7$  Hz, 1H, ArH), 7.72 (d,  $J = 8.0$  Hz, 2H, ArH), 7.66 (t,  $J = 7.7$  Hz, 4H, ArH), 7.62–7.34 (m, 20H, ArH), 7.24–7.13 (m, 4H, ArH), 7.07 (t,  $J = 7.3$  Hz, 2H, ArH), 6.87 (d,  $J = 7.3$  Hz, 2H, ArH), 6.79 (d,  $J = 6.4$  Hz, 2H, ArH), 6.74 (d,  $J = 7.8$  Hz, 2H,



ArH), 6.71 (d,  $J = 7.8$  Hz, 2H, ArH), 3.87 (m, 2H,  $\text{CH}_3\text{CHN}$ ), 2.42 (m, 4H, octynyl), 1.64–1.56 (m, 4H, octynyl), 1.53–1.44 (m, 4H, octynyl), 1.40–1.27 (m, 8H, octynyl), 0.95–0.87 (m, 6H, octynyl), 0.69 (d,  $J = 6.3$  Hz, 3H,  $\text{CH}_3\text{CHN}$ ), 0.60 (d,  $J = 6.3$  Hz, 3H,  $\text{CH}_3\text{CHN}$ ), 0.37 (s, 9H,  $\text{SiCH}_3$ ), 0.24 (s, 9H,  $\text{SiCH}_3$ );  $^{13}\text{C}$  NMR (125 MHz,  $\text{THF-}d_8$ , 25 °C)  $\delta$  176.95, 170.06, 163.17, 144.51, 144.35, 144.21, 143.49, 142.64, 142.52, 142.32, 142.22, 141.60, 140.63, 140.49, 140.29, 140.17, 138.45, 138.07, 134.22, 133.72, 133.59, 133.29, 133.01, 132.78, 132.61, 132.23, 131.52, 130.24, 130.20, 130.10, 130.02, 129.98, 129.80, 129.64, 127.55, 127.47, 126.15, 123.88, 123.68, 123.20, 123.14, 122.91, 122.78, 122.01, 121.20, 106.83, 106.10, 95.28, 95.13, 92.84, 90.63, 83.35, 83.00, 81.99, 81.40, 81.34, 80.60, 77.18, 76.64, 75.63, 75.60, 56.47, 32.55, 32.52, 30.82, 29.97, 29.79, 29.75, 29.71, 23.62, 23.44, 23.20, 20.14, 20.07, 14.58, 0.56, 0.18; IR (KBr,  $\text{cm}^{-1}$ ): 3421 ( $\nu_{\text{N-H}}$ ,  $\nu_{\text{O-H}}$ ), 2157 ( $\nu_{\text{C}\equiv\text{C}}$ ), 1727 ( $\nu_{\text{C=O}}$ ), 1652 ( $\nu_{\text{C=N}}$ ); HRMS(ESI):  $m/z$  calcd for  $[\text{M}(\text{C}_{107}\text{H}_{96}\text{N}_2\text{O}_4\text{Si}_2)+\text{H}]^+$ , 1529.6987; found 1529.7002; Anal. Calcd for  $\text{C}_{107}\text{H}_{96}\text{N}_2\text{O}_4\text{Si}_2$ : C, 83.99; H, 6.32; N, 1.83. Found: C, 83.91; H, 6.33; N, 1.64.

**CCA.** CuI (0.50 mg, 2.7  $\mu\text{mol}$ ) was added to a solution of **CC-H** (25 mg, 27  $\mu\text{mol}$ ), **A-H**<sup>1</sup> (48 mg, 80  $\mu\text{mol}$ ), and  $(\text{Ph}_3\text{P})_2\text{PdCl}_2$  (1.9 mg, 2.7  $\mu\text{mol}$ ) in  $\text{THF-Et}_3\text{N}$  (10/1 (v/v), 11 mL). After the mixture was stirred at room temperature for 20 h, the solvent was evaporated to dryness. The residue was then dissolved in  $\text{CHCl}_3$  (30 mL) and the solution was washed with 1 M HCl aq. (10 mL), water (10 mL), and brine (10 mL), successively, and dried over anhydrous  $\text{Na}_2\text{SO}_4$ . The residue was purified by column chromatography ( $\text{NH}_2\text{-SiO}_2$ ,  $\text{CHCl}_3/\text{AcOH} = 100/0$  to 100/2 (v/v)). The eluent was washed with saturated  $\text{NaHCO}_3$  aq. (30 mL  $\times$  2), water (30 mL), 1 M HCl aq. (30 mL), water (30 mL), and brine (30 mL), successively, and dried over anhydrous  $\text{Na}_2\text{SO}_4$ . The residue was further purified by column chromatography ( $\text{SiO}_2$ , hexane/THF = 20/1 to 1/1 (v/v)) and SEC (Bio-Beads S-X3,  $\text{CHCl}_3$ ) to afford **CCA** (9.4 mg, 25% yield) as a white solid.  $[\alpha]_{\text{D}}^{20} -534$  ( $c = 0.1$  in  $\text{CHCl}_3$ );  $^1\text{H}$  NMR (500 MHz,

CDCl<sub>3</sub>, 25 °C)  $\delta$  13.41–13.28 (m, 2H, NH), 7.77–7.55 (m, 13H, ArH), 7.48–7.25 (m, 15H, ArH), 7.18–7.13 (m, 3H, ArH), 7.09 (t,  $J$  = 7.7 Hz, 2H, ArH), 6.77 (d,  $J$  = 7.5 Hz, 2H, ArH), 6.74–6.68 (m, 2H, ArH), 6.62 (d,  $J$  = 8.2 Hz, 2H, ArH), 6.55 (d,  $J$  = 8.2 Hz, 2H, ArH), 3.83–3.72 (m, 2H, CH<sub>3</sub>CHN), 2.43–2.37 (m, 4H, octynyl), 1.64–1.55 (m, 4H, octynyl), 1.49–1.40 (m, 4H, octynyl), 1.36–1.27 (m, 8H, octynyl), 0.93–0.86 (m, 6H, octynyl), 0.69 (d,  $J$  = 6.7 Hz, 3H, CH<sub>3</sub>CHN), 0.59 (d,  $J$  = 6.7 Hz, 3H, CH<sub>3</sub>CHN), 0.31 (s, 9H, SiCH<sub>3</sub>), 0.27 (s, 9H, SiCH<sub>3</sub>); <sup>13</sup>C NMR (125 MHz, CDCl<sub>3</sub>, 25 °C)  $\delta$  176.61, 162.09, 142.72, 142.42, 142.38, 141.69, 141.37, 141.16, 140.51, 138.56, 138.03, 137.19, 136.83, 132.79, 132.68, 132.60, 132.10, 132.04, 131.76, 131.64, 131.35, 129.11, 129.00, 128.95, 128.67, 128.54, 128.40, 126.33, 126.29, 123.55, 122.79, 122.54, 122.11, 121.91, 121.84, 121.54, 120.34, 105.78, 104.10, 96.38, 94.59, 90.29, 82.09, 81.75, 80.80, 80.78, 80.74, 80.44, 79.34, 76.25, 76.03, 75.56, 75.05, 55.58, 55.54, 55.47, 31.37, 31.32, 29.69, 28.73, 28.65, 28.60, 28.53, 22.79, 22.55, 22.52, 19.49, 19.42, 14.06, 14.04, 0.24, 0.00; IR (KBr, cm<sup>-1</sup>): 3424 ( $\nu_{\text{N-H}}$ ,  $\nu_{\text{O-H}}$ ), 2157 ( $\nu_{\text{C}\equiv\text{C}}$ ), 1719 ( $\nu_{\text{C=O}}$ ), 1649 ( $\nu_{\text{C=N}}$ ); HRMS(ESI):  $m/z$  calcd for [M(C<sub>107</sub>H<sub>96</sub>N<sub>2</sub>O<sub>4</sub>Si<sub>2</sub>)+H]<sup>+</sup>, 1529.6987; found 1529.6925; Anal. Calcd for C<sub>107</sub>H<sub>96</sub>N<sub>2</sub>O<sub>4</sub>Si<sub>2</sub>: C, 83.99; H, 6.32; N, 1.83. Found: C, 83.87; H, 6.20; N, 1.82.

**CCC.** CuI (0.57 mg, 3.0  $\mu$ mol) was added to a solution of **CC-H** (28 mg, 30  $\mu$ mol), **C-H<sup>3</sup>** (45 mg, 90  $\mu$ mol), and (Ph<sub>3</sub>P)<sub>2</sub>PdCl<sub>2</sub> (2.1 mg, 3.0  $\mu$ mol) in THF-Et<sub>3</sub>N (10/1 (v/v), 11 mL). After the mixture was stirred at room temperature for 14 h, the solvent was evaporated to dryness. The residue was then dissolved in CHCl<sub>3</sub> (30 mL) and the solution was washed with 1 M HCl aq. (10 mL), water (10 mL), and brine (10 mL), successively, and dried over anhydrous Na<sub>2</sub>SO<sub>4</sub>. The residue was purified by column chromatography (SiO<sub>2</sub>, hexane/THF = 10/1 to 8/3 (v/v)) and SEC (Bio-Beads S-X3, CHCl<sub>3</sub>) to afford **CCC** (18 mg, 42% yield) as a white solid. <sup>1</sup>H NMR (500 MHz, CDCl<sub>3</sub>, 25 °C)  $\delta$  7.65–7.53 (m, 12H, ArH), 7.39–7.35 (m, 6H, ArH), 7.35–7.30 (m, 8H, ArH), 7.28–7.24 (m, 4H, ArH), 2.40 (t,  $J$  = 7.1

Hz, 6H, octynyl), 1.63–1.55 (m, 6H, octynyl), 1.42–1.40 (m, 6H, octynyl), 1.35–1.27 (m, 12H, octynyl), 0.92–0.86 (m, 9H, octynyl), 0.30 (s, 18H, SiCH<sub>3</sub>); <sup>13</sup>C NMR (125 MHz, CDCl<sub>3</sub>, 25 °C) δ 176.38, 140.22, 140.10, 139.62, 139.41, 139.25, 139.19, 132.73, 132.70, 131.97, 131.82, 131.60, 128.39, 128.26, 126.02, 125.84, 127.96, 121.76, 121.66, 104.87, 96.13, 95.65, 93.22, 93.05, 81.40, 81.34, 79.42, 79.33, 75.85, 75.78, 31.34, 28.61, 28.55, 22.54, 19.44, 14.06, 0.05; IR (KBr, cm<sup>-1</sup>): 3138 (ν<sub>O-H</sub>), 2157 (ν<sub>C≡C</sub>), 1700 (ν<sub>C=O</sub>); HRMS(ESI): m/z calcd for [M(C<sub>99</sub>H<sub>90</sub>O<sub>6</sub>Si<sub>2</sub>)–H]<sup>-</sup>, 1429.6198; found 1429.6144; Anal. Calcd for C<sub>99</sub>H<sub>90</sub>O<sub>6</sub>Si<sub>2</sub>: C, 83.04; H, 6.34. Found: C, 82.95; H, 6.36.

**AAAA.** CuI (2.25 mg, 0.012 mmol) was added to a solution of **AA-H** (266 mg, 0.24 mmol) and (Ph<sub>3</sub>P)<sub>2</sub>PdCl<sub>2</sub> (8.3 mg, 0.012 mmol) in Et<sub>3</sub>N (0.5 mL) and THF (5.0 mL). After the mixture was stirred at ambient temperature for 3 h, the solvent was evaporated to dryness. The residue was then purified by column chromatography (NH-SiO<sub>2</sub>, hexane/EtOAc = 6/1 (v/v)) to afford **AAAA** (154 mg, 58% yield) as a white solid. M.p. = 179–181 °C. <sup>1</sup>H NMR (500 MHz, CDCl<sub>3</sub>, 25 °C, as **AAAA**·(CH<sub>3</sub>CO<sub>2</sub>H)<sub>4</sub>) δ 12.67 (br s, 8H, NH), 7.83–7.75 (m, 4H, ArH), 7.57–7.51 (m, 8H, ArH), 7.35–7.21 (m, 40H, ArH), 7.07–6.99 (m, 16H, ArH), 6.74–6.63 (m, 16H, ArH), 2.10 (s, 12H, CH<sub>3</sub>CO<sub>2</sub>), 0.78–0.67 (m, 24H, CH<sub>3</sub>CHN), 0.26 (s, 18H, SiCH<sub>3</sub>). HRMS(ESI): m/z calcd for [M+2H]<sup>2+</sup>, 1126.5364; found 1123.5369.

**CCCC.** CuI (3.05 mg, 0.016 mmol) was added to a solution of **CC-H** (298 mg, 0.320 mmol) and (Ph<sub>3</sub>P)<sub>2</sub>PdCl<sub>2</sub> (11.2 mg, 0.016 mmol) in Et<sub>3</sub>N (0.35 mL) and THF (3.5 mL). After being stirred at ambient temperature for 3 h, the mixture was partitioned between CHCl<sub>3</sub> (100 mL) and 1 M HCl (50 mL), and the organic layer was dried over anhydrous MgSO<sub>4</sub>, filtered, and evaporate to dryness. The residue was purified by column chromatography (SiO<sub>2</sub>, hexane/THF = 2/1 (v/v)) and recycling preparative SEC (CHCl<sub>3</sub>) to afford **CCCC** (208 mg, 70% yield) as a white solid. M.p. > 300 °C; <sup>1</sup>H

NMR (500 MHz, CDCl<sub>3</sub>, 1.5 mM, 25 °C)  $\delta$  7.67–7.54 (m, 16H, ArH), 7.42–7.22 (m, 24H, ArH), 2.40 (t,  $J$  = 7.1 Hz, 8H, CH<sub>2</sub>C $\equiv$ C), 1.67–1.52 (m, 8H, CH<sub>2</sub>), 1.49–1.38 (m, 8H, CH<sub>2</sub>), 1.36–1.25 (m, 16H, CH<sub>2</sub>), 0.95–0.83 (m, 12H, octynyl), 0.30 (s, 18H, SiCH<sub>3</sub>). HRMS(ESI):  $m/z$  calcd for [M]<sup>−</sup>, 1858.8052; found 1858.7951.

**AA•CC.** **AA**<sup>1</sup> (10.23 mg, 8.527  $\mu$ mol) and **CC** (8.55 mg, 8.527  $\mu$ mol) were dissolved in CDCl<sub>3</sub> (4.0 mL), and the solution was stirred at ambient temperature. The solution was evaporated to dryness to afford **AA•CC** (18.78 mg, quant.) as a white solid. Mp: 270 °C (decomp.). <sup>1</sup>H NMR (CDCl<sub>3</sub>, 2.1 mM, 25 °C)  $\delta$  13.39 (d,  $J$  = 9.1 Hz, 2H, NH), 13.34 (d,  $J$  = 8.9 Hz, 2H, NH), 7.76–7.58 (m, 18H, ArH), 7.48–7.28 (m, 18H, ArH), 7.18–7.08 (m, 10H, ArH), 6.79 (d,  $J$  = 7.4 Hz, 4H, ArH), 6.73–6.67 (m, 4H, ArH), 6.61 (d,  $J$  = 8.4 Hz, 4H, ArH), 6.55 (d,  $J$  = 8.3 Hz, 4H, ArH), 3.82–3.71 (m, 4H, CHN), 2.40 (t,  $J$  = 7.2 Hz, 4H, CH<sub>2</sub>C $\equiv$ C), 1.65–1.52 (m, 4H, CH<sub>2</sub>), 1.49–1.40 (m, 4H, CH<sub>2</sub>), 1.38–1.28 (m, 8H, CH<sub>2</sub>), 0.95–0.86 (m, 6H, CH<sub>3</sub>), 0.67 (d,  $J$  = 6.8 Hz, 6H, NCHCH<sub>3</sub>), 0.59 (d,  $J$  = 6.7 Hz, 6H, NCHCH<sub>3</sub>), 0.31 (s, 18H, TMS), 0.27 (s, 18H, SiCH<sub>3</sub>). Anal. Calcd for C<sub>152</sub>H<sub>144</sub>N<sub>4</sub>O<sub>4</sub>Si<sub>4</sub>: C, 82.86; H, 6.59; N, 2.54. Found: C, 82.68; H, 6.67; N, 2.45.

**AAA•CCC.** **AAA** (3.5 mg, 2.0  $\mu$ mol) and **CCC** (2.9 mg, 2.0  $\mu$ mol) were dissolved in CHCl<sub>3</sub> (5 mL). After the mixture was allowed to stand at room temperature for 2 h, the solvent was evaporated. The crude product was purified by recycling preparative SEC with CHCl<sub>3</sub> as the eluent to afford **AAA•CCC** (5.3 mg, 84% yield) as a white solid.  $[\alpha]_D^{20}$  −689 ( $c$  = 0.05 in CHCl<sub>3</sub>); <sup>1</sup>H NMR (500 MHz, CDCl<sub>3</sub>, 25 °C)  $\delta$  13.41 (d,  $J$  = 9.1 Hz, 2H, NH), 13.36 (d,  $J$  = 9.0 Hz, 2H, NH), 13.32 (d,  $J$  = 8.7 Hz, 2H, NH), 7.79–7.69 (m, 11H, ArH), 7.69–7.64 (m, 12H, ArH), 7.61 (d,  $J$  = 8.3 Hz, 4H, ArH), 7.50–7.24 (m, 28H, ArH), 7.18–7.08 (m, 14H, ArH), 6.84 (d,  $J$  = 7.5 Hz, 4H, ArH), 6.79 (d,  $J$  = 7.5 Hz, 4H, ArH),

6.72–6.67 (m, 4H, ArH), 6.65–6.59 (m, 8H, ArH), 6.55 (d,  $J = 8.2$  Hz, 4H, ArH), 3.83–3.72 (m, 6H,  $\text{CH}_3\text{CHN}$ ), 2.40 (t,  $J = 7.1$  Hz, 6H, octynyl), 1.66–1.54 (m, 6H, octynyl), 1.48–1.41 (m, 6H, octynyl), 1.37–1.28 (m, 12H, octynyl), 0.93–0.87 (m, 9H, octynyl), 0.70–0.63 (m, 12H,  $\text{CH}_3\text{CHN}$ ), 0.59 (d,  $J = 6.7$  Hz, 6H,  $\text{CH}_3\text{CHN}$ ), 0.31 (s, 18H,  $\text{SiCH}_3$ ), 0.27 (s, 18H,  $\text{SiCH}_3$ );  $^{13}\text{C}$  NMR (125 MHz,  $\text{CDCl}_3$ , 25 °C)  $\delta$  176.55, 162.10, 142.62, 142.40, 142.37, 142.22, 141.70, 141.65, 141.35, 141.32, 141.18, 141.10, 140.58, 140.50, 140.45, 138.70, 138.63, 138.58, 138.05, 137.19, 136.85, 136.82, 132.11, 132.00, 131.96, 131.88, 131.66, 131.53, 131.34, 129.20, 129.12, 129.09, 128.99, 128.95, 128.70, 128.54, 126.39, 126.34, 126.27, 123.54, 122.82, 122.73, 122.59, 122.55, 122.48, 122.00, 121.92, 121.84, 120.57, 120.51, 105.77, 104.11, 102.35, 96.36, 94.61, 90.33, 90.25, 81.48, 81.44, 81.18, 81.15, 80.46, 80.41, 75.97, 75.93, 75.19, 55.57, 55.50, 55.44, 31.37, 28.73, 28.65, 22.82, 22.60, 22.55, 22.49, 19.49, 14.06, 0.23, 0.00; IR (KBr,  $\text{cm}^{-1}$ ): 3430 ( $\nu_{\text{N-H}}$ ,  $\nu_{\text{O-H}}$ ), 2156 ( $\nu_{\text{C}\equiv\text{C}}$ ), 1655 ( $\nu_{\text{C=O}}$ ,  $\nu_{\text{C=N}}$ ); CSI-MS:  $m/z$  calcd for  $[\text{M}(\text{C}_{222}\text{H}_{198}\text{N}_6\text{O}_6\text{Si}_4)+2\text{H}]^{2+}$ , 1578.72; found 1578.90; Anal. Calcd for  $\text{C}_{222}\text{H}_{198}\text{N}_6\text{O}_6\text{Si}_4$ : C, 84.42; H, 6.32; N, 2.66. Found: C, 84.32; H, 6.33; N, 2.72.

**AAC·CCA.** AAC (3.3 mg, 2.0  $\mu\text{mol}$ ) and CCA (3.1 mg, 2.0  $\mu\text{mol}$ ) were dissolved in  $\text{CHCl}_3$  (5 mL). After the mixture was allowed to stand at room temperature for 14 h, the solvent was evaporated. The crude product was purified by recycling preparative SEC with  $\text{CHCl}_3$  as the eluent to afford AAC·CCA (4.4 mg, 70% yield) as a white solid.  $[\alpha]_{\text{D}}^{20} -693$  ( $c = 0.05$  in  $\text{CHCl}_3$ );  $^1\text{H}$  NMR (500 MHz,  $\text{CDCl}_3$ , 25 °C)  $\delta$  13.48–13.28 (m, 6H, NH), 7.79–7.57 (m, 27H, ArH), 7.53–7.21 (m, 28H, ArH), 7.19–7.04 (m, 14H, ArH), 6.86 (d,  $J = 7.6$  Hz, 2H, ArH), 6.82–6.67 (m, 10H, ArH), 6.65–6.58 (m, 8H, ArH), 6.55 (d,  $J = 7.8$  Hz, 4H, ArH), 3.87–3.71 (m, 6H,  $\text{CH}_3\text{CHN}$ ), 2.44–2.35 (m, 6H, octynyl), 1.69–1.40 (m, 12H, octynyl), 1.37–1.28 (m, 12H, octynyl), 0.93–0.86 (m, 9H, octynyl), 0.75–0.56 (m, 18H,  $\text{CH}_3\text{CHN}$ ), 0.31 (s, 18H,  $\text{SiCH}_3$ ), 0.27 (s, 9H,  $\text{SiCH}_3$ ), 0.27 (s, 9H,  $\text{SiCH}_3$ );  $^{13}\text{C}$  NMR (125 MHz,  $\text{CDCl}_3$ , 25 °C)  $\delta$

176.61, 176.55, 162.05, 143.17, 142.85, 142.61, 142.51, 142.41, 142.35, 142.15, 141.69, 141.40, 141.34, 141.16, 140.52, 140.45, 138.71, 138.63, 138.56, 138.47, 138.42, 138.03, 137.17, 136.86, 136.83, 136.79, 132.76, 132.66, 132.10, 132.04, 131.95, 131.88, 131.68, 131.60, 131.51, 131.34, 130.22, 129.20, 129.13, 129.09, 128.99, 128.93, 128.69, 128.53, 126.41, 126.34, 123.54, 122.81, 122.78, 122.69, 122.61, 122.55, 122.49, 122.38, 122.29, 122.00, 121.91, 121.84, 120.52, 120.19, 120.16, 105.79, 104.09, 96.34, 90.38, 90.30, 82.56, 81.48, 80.44, 80.41, 80.37, 80.17, 80.15, 75.96, 75.94, 75.24, 74.72, 74.67, 55.56, 55.45, 31.36, 28.72, 28.65, 22.54, 19.49, 14.06, 0.23, 0.00; IR (KBr,  $\text{cm}^{-1}$ ): 3432 ( $\nu_{\text{N-H}}$ ,  $\nu_{\text{O-H}}$ ), 2156 ( $\nu_{\text{C}\equiv\text{C}}$ ), 1655 ( $\nu_{\text{C=O}}$ ,  $\nu_{\text{C=N}}$ ); CSI-MS:  $m/z$  calcd for  $[\text{M}(\text{C}_{222}\text{H}_{198}\text{N}_6\text{O}_6\text{Si}_4)+2\text{H}]^{2+}$ , 1578.73; found 1578.90; Anal. Calcd for  $\text{C}_{222}\text{H}_{198}\text{N}_6\text{O}_6\text{Si}_4$ : C, 84.42; H, 6.32; N, 2.66. Found: C, 84.33; H, 6.05; N, 2.81.

**ACA·CAC.** **ACA** (3.3 mg, 2.0  $\mu\text{mol}$ ) and **CAC** (3.1 mg, 2.0  $\mu\text{mol}$ ) were dissolved in  $\text{CHCl}_3$  (5 mL). After the mixture was allowed to stand at room temperature for 14 h, the solvent was evaporated. The crude product was purified by recycling preparative SEC with  $\text{CHCl}_3$  as the eluent to afford **ACA·CAC** (4.2 mg, 66% yield) as a white solid.  $[\alpha]_{\text{D}}^{20}$   $-697$  ( $c = 0.05$  in  $\text{CHCl}_3$ );  $^1\text{H}$  NMR (500 MHz,  $\text{CDCl}_3$ , 25  $^\circ\text{C}$ )  $\delta$  13.48 (d,  $J = 9.0$  Hz, 2H, NH), 13.39 (d,  $J = 8.9$  Hz, 2H, NH), 13.36 (d,  $J = 9.0$  Hz, 2H, NH), 7.76–7.58 (m, 27H, ArH), 7.48–7.35 (m, 25H, ArH), 7.27–7.21 (m, 3H, ArH), 7.19–7.13 (m, 6H, ArH), 7.11–7.04 (m, 8H, ArH), 6.82 (d,  $J = 7.6$  Hz, 4H, ArH), 6.77–6.69 (m, 8H, ArH), 6.64–6.58 (m, 8H, ArH), 6.55 (d,  $J = 8.2$  Hz, 4H, ArH), 3.85–3.72 (m, 6H,  $\text{CH}_3\text{CHN}$ ), 2.43–2.35 (m, 6H, octynyl), 1.68–1.50 (m, 6H, octynyl), 1.48–1.38 (m, 6H, octynyl), 1.38–1.20 (m, 12H, octynyl), 0.93–0.85 (m, 9H, octynyl), 0.74–0.66 (m, 12H,  $\text{CH}_3\text{CHN}$ ), 0.59 (d,  $J = 6.8$  Hz, 6H,  $\text{CH}_3\text{CHN}$ ), 0.31 (s, 18H,  $\text{SiCH}_3$ ), 0.27 (s, 18H,  $\text{SiCH}_3$ );  $^{13}\text{C}$  NMR (125 MHz,  $\text{CDCl}_3$ , 25  $^\circ\text{C}$ )  $\delta$  176.68, 176.60, 162.06, 162.00, 142.84, 142.63, 142.53, 142.35, 141.71, 141.40, 141.17, 140.52, 138.45, 138.41, 138.03, 137.16, 136.81,

136.74, 129.21, 129.14, 129.08, 128.99, 128.92, 128.90, 128.60, 128.53, 126.43, 126.35, 126.30, 123.54, 122.78, 122.69, 122.65, 122.55, 122.40, 122.31, 121.82, 120.15, 120.13, 105.79, 104.09, 96.39, 94.58, 90.44, 90.30, 82.58, 80.41, 80.14, 76.43, 74.69, 74.62, 55.53, 31.36, 29.69, 28.72, 28.64, 22.74, 22.54, 19.48, 14.05, 0.23, -0.01; IR (KBr,  $\text{cm}^{-1}$ ): 3432 ( $\nu_{\text{N-H}}$ ,  $\nu_{\text{O-H}}$ ), 2156 ( $\nu_{\text{C}\equiv\text{C}}$ ), 1655 ( $\nu_{\text{C}=\text{N}}$ ,  $\nu_{\text{C}=\text{N}}$ ); Anal. Calcd for  $\text{C}_{222}\text{H}_{198}\text{N}_6\text{O}_6\text{Si}_4$ : C, 84.42; H, 6.32; N, 2.66. Found: C, 84.24; H, 6.10; N, 2.79.

**AAAA·CCCC.** **AAAA** (5.00 mg, 2.21  $\mu\text{mol}$ ) and **CCCC** (4.13 mg, 2.21  $\mu\text{mol}$ ) were dissolved in  $\text{CDCl}_3$  (10 mL), and the solution was stirred at ambient temperature. The solution was evaporated to dryness to afford **AAAA·CCCC** (9.13 mg, quant.) as a white solid. Mp: > 300 °C.  $^1\text{H}$  NMR ( $\text{CDCl}_3$ , 1.0 mM, 25 °C)  $\delta$  13.51–13.25 (m, 8H, NH), 7.80–7.57 (m, 36H, ArH), 7.53–7.28 (m, 36H, ArH), 7.19–7.06 (m, 20H, ArH), 6.90–6.52 (m, 32H, ArH), 3.86–3.71 (m, 8H, CHN), 2.40 (t,  $J = 7.2$  Hz, 8H,  $\text{CH}_2\text{C}\equiv\text{C}$ ), 1.68–1.51 (m, 8H,  $\text{C}\equiv\text{CCH}_2$ ), 1.50–1.41 (m, 8H,  $\text{CH}_2$ ), 1.39–1.20 (m, 16H,  $\text{CH}_2$ ), 0.98–0.81 (m, 12H,  $\text{CH}_3$ ), 0.68–0.55 (m, 24H,  $\text{NCHCH}_3$ ), 0.31 (s, 18H,  $\text{SiCH}_3$ ), 0.27 (s, 18H, TMS). Anal. Calcd for  $\text{C}_{292}\text{H}_{252}\text{N}_8\text{O}_8\text{Si}_4$ : C, 85.26; H, 6.17; N, 2.72. Found: C, 85.27; H, 6.02; N, 2.83.

## Supporting Reference

1. Tanaka, Y.; Katagiri, H.; Furusho, Y.; Yashima, E. *Angew. Chem., Int. Ed.* **2005**, *44*, 3867–3870.
2. Ikeda, M.; Tanaka, Y.; Hasegawa, T.; Furusho, Y.; Yashima, E. *J. Am. Chem. Soc.* **2006**, *128*, 6806–6807.
3. Maeda, T.; Furusho, Y.; Sakurai, S.-i.; Kumaki, J.; Okoshi, K.; Yashima, E. *J. Am. Chem. Soc.* **2008**, *130*, 7938–7945.

## 1. Double Helix Formation of Dimers

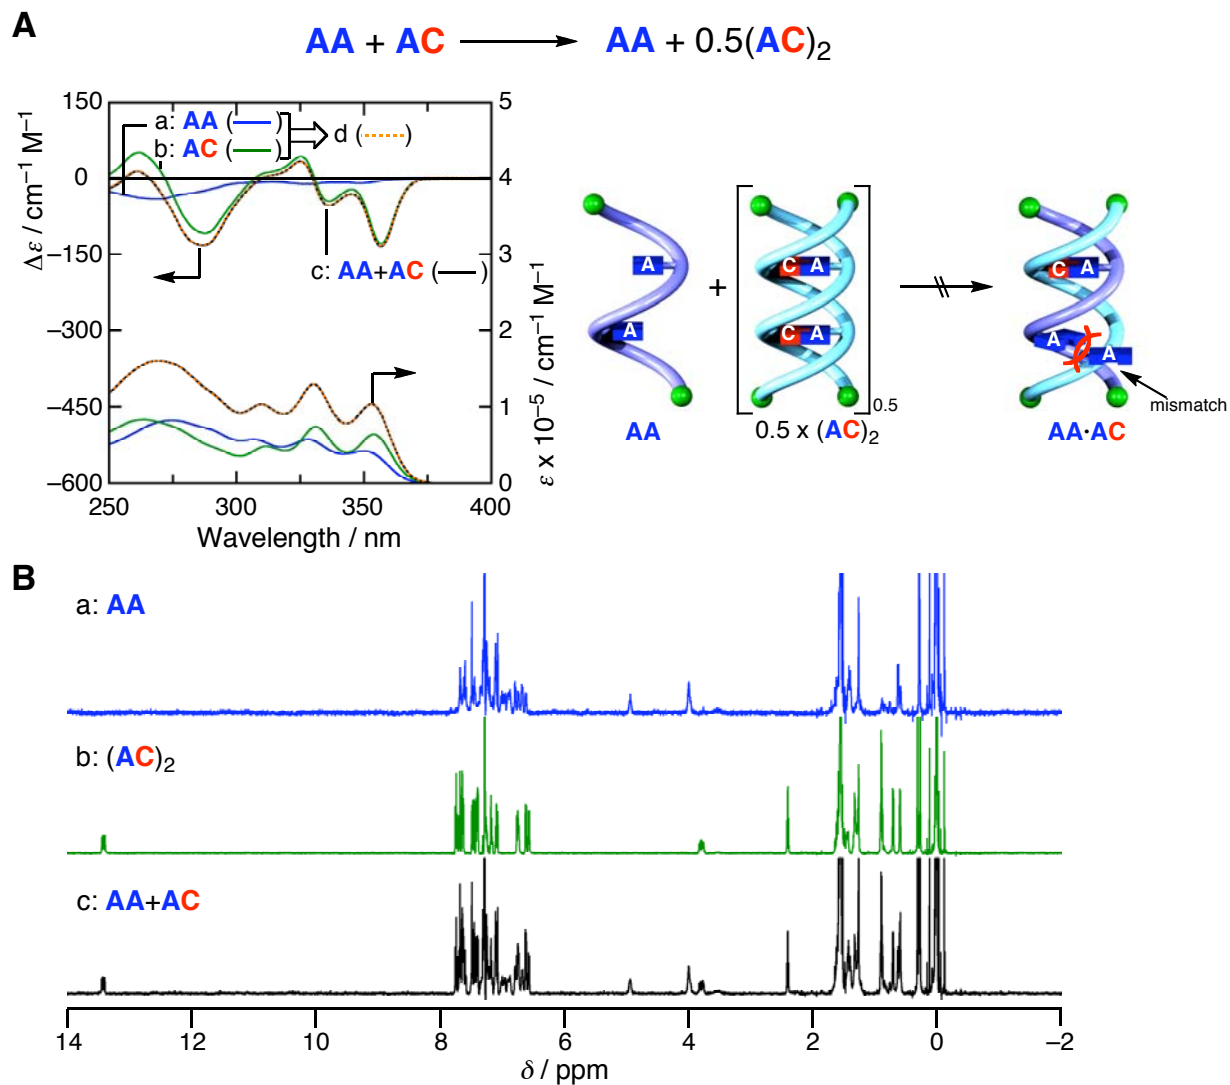

**Figure S1.** (A) CD and absorption spectra of **AA** (a, blue), **AC** (b, green), and an equimolar mixture of **AA** and **AC** (c, black) in  $\text{CDCl}_3$  (0.10 mM, 25 °C, cell length: 0.1 cm), and the sum spectrum of a and b (d, dashed orange), (B)  $^1\text{H}$  NMR spectra of **AA** (a, blue),  $(\text{AC})_2$  (b, green), and an equimolar mixture of **AA** and **AC** (c, black) in  $\text{CDCl}_3$  (0.10 mM, 25 °C).



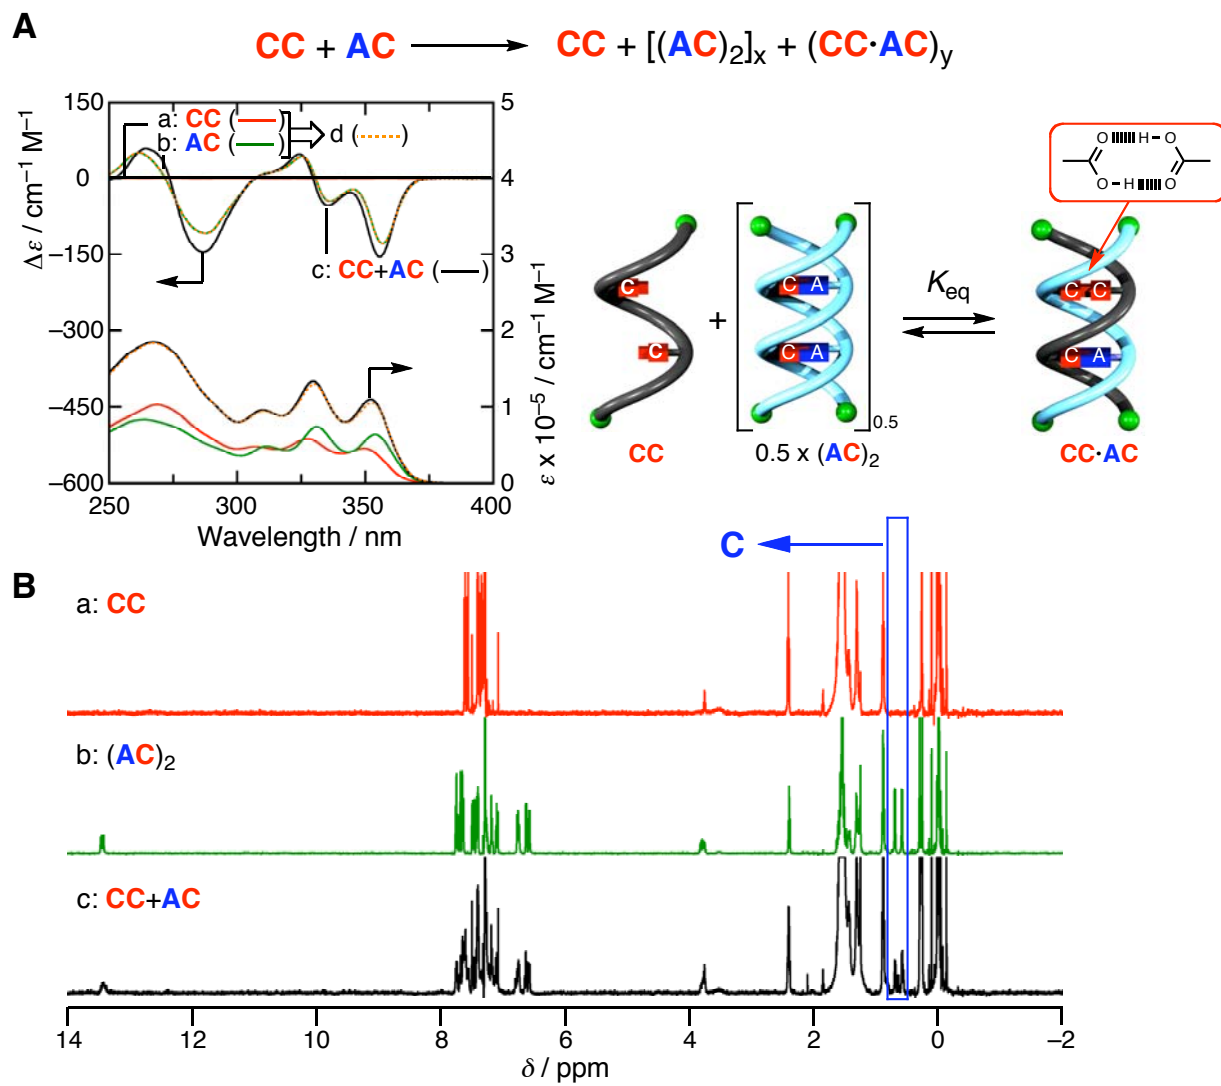

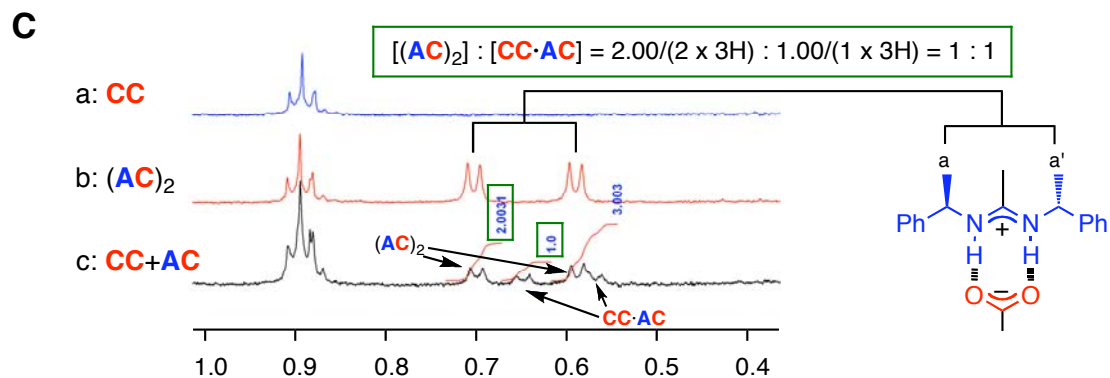

## 2. Sequence-Specific Sorting of Dimers through Double Helix Formation

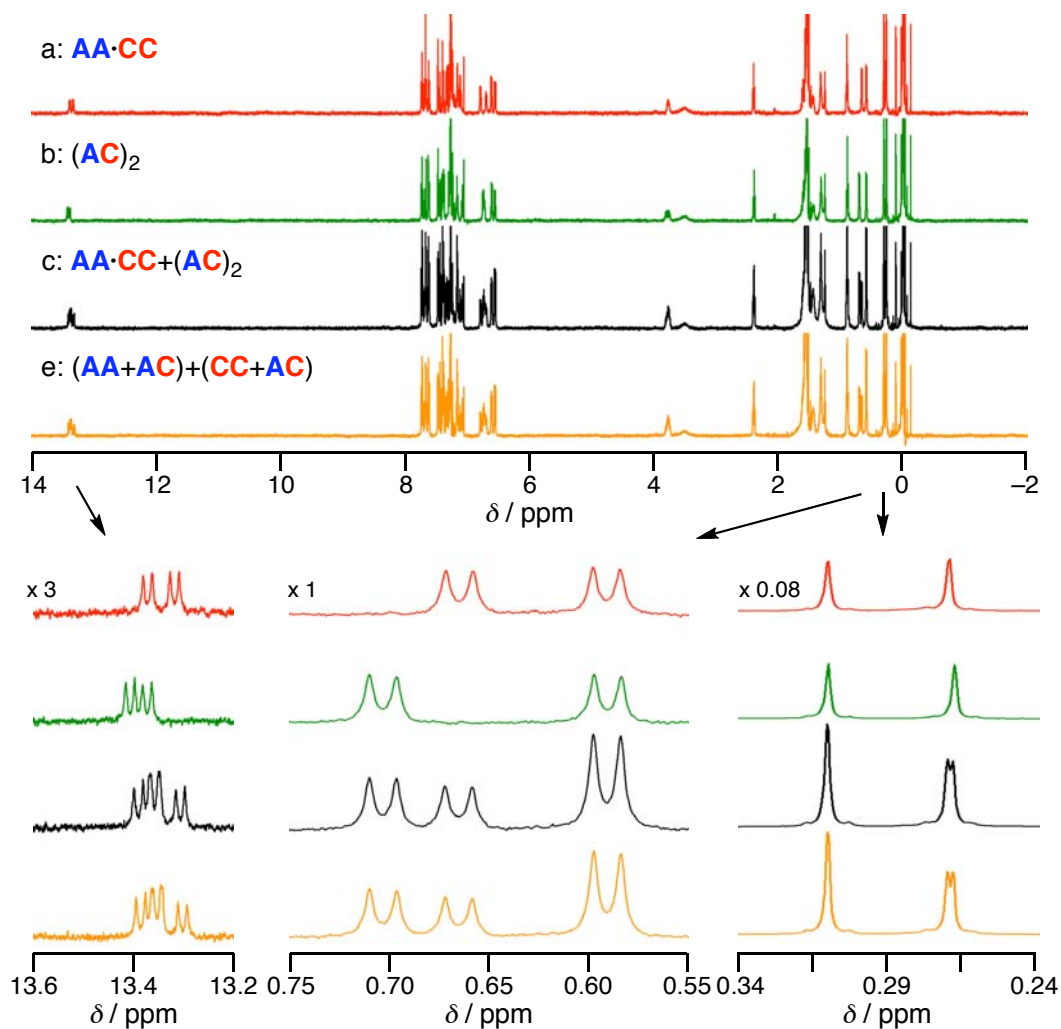

**Figure S3.**  $^1\text{H}$  NMR spectra of AA·CC (a, red, 0.10 mM), (AC)<sub>2</sub> (b, green, 0.10 mM), the mixture of AA·CC and (AC)<sub>2</sub> (c, black, 50  $\mu\text{M}$ ), and the mixture of (AA+AC) and (CC+AC) (e, orange) in  $\text{CDCl}_3$  at 25  $^\circ\text{C}$ .

### 3. Double Helix Formation of Trimers

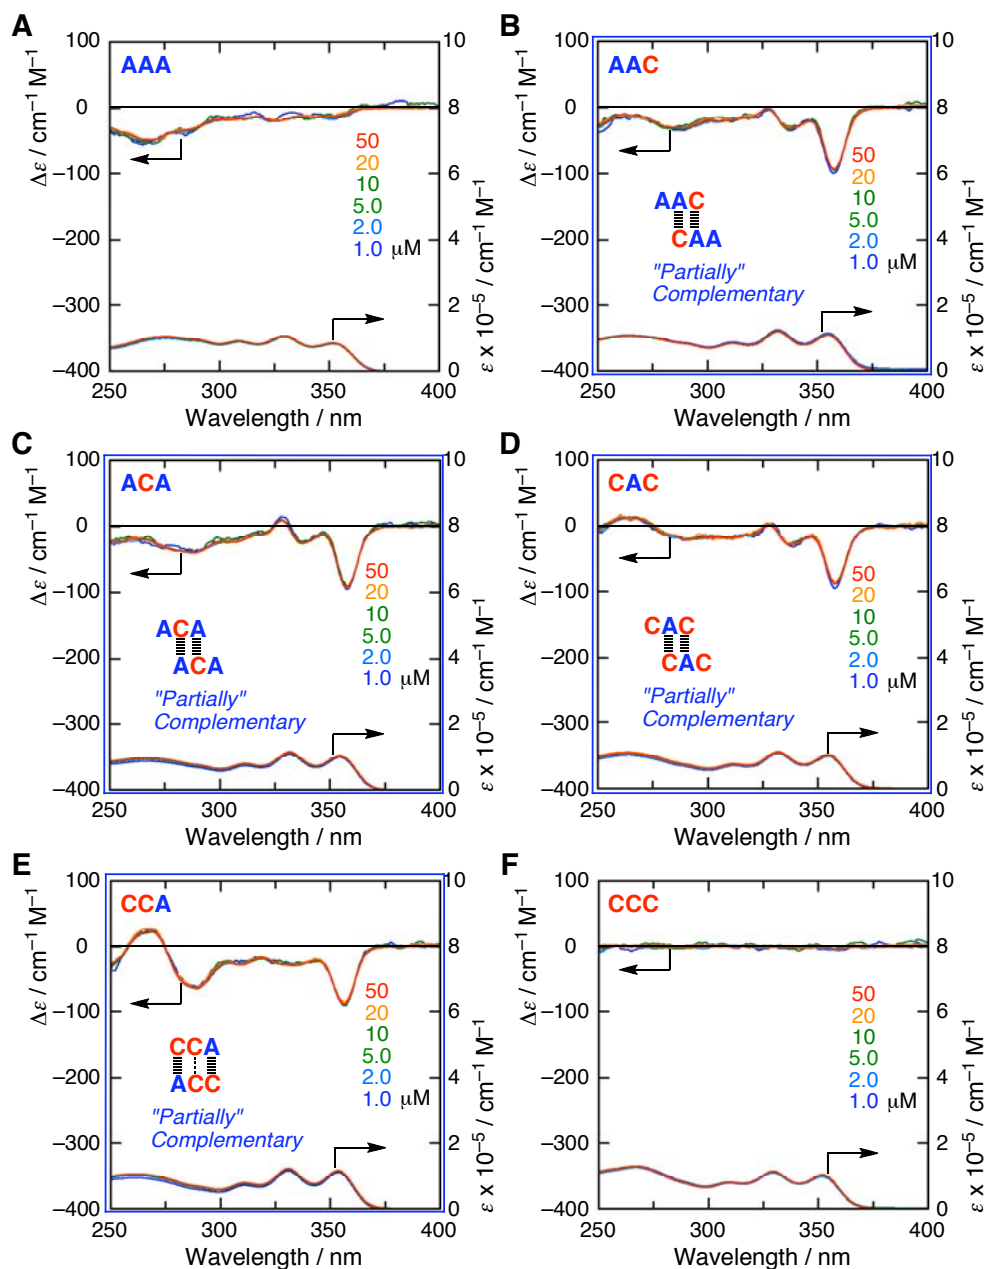

**Figure S4.** Concentration dependent changes in CD and absorption spectra of AAA (A), AAC (B), ACA (C), CAC (D), CCA (E), and CCC (F) in  $\text{CDCl}_3$  at 25 °C measured in 0.1-cm (50  $\mu\text{M}$ , 20  $\mu\text{M}$ , 10  $\mu\text{M}$ ) and 1.0-cm (5.0  $\mu\text{M}$ , 2.0  $\mu\text{M}$ , 1.0  $\mu\text{M}$ ) quartz cells.

#### 4. Sequence-Specific Sorting of Trimers through Double Helix Formation

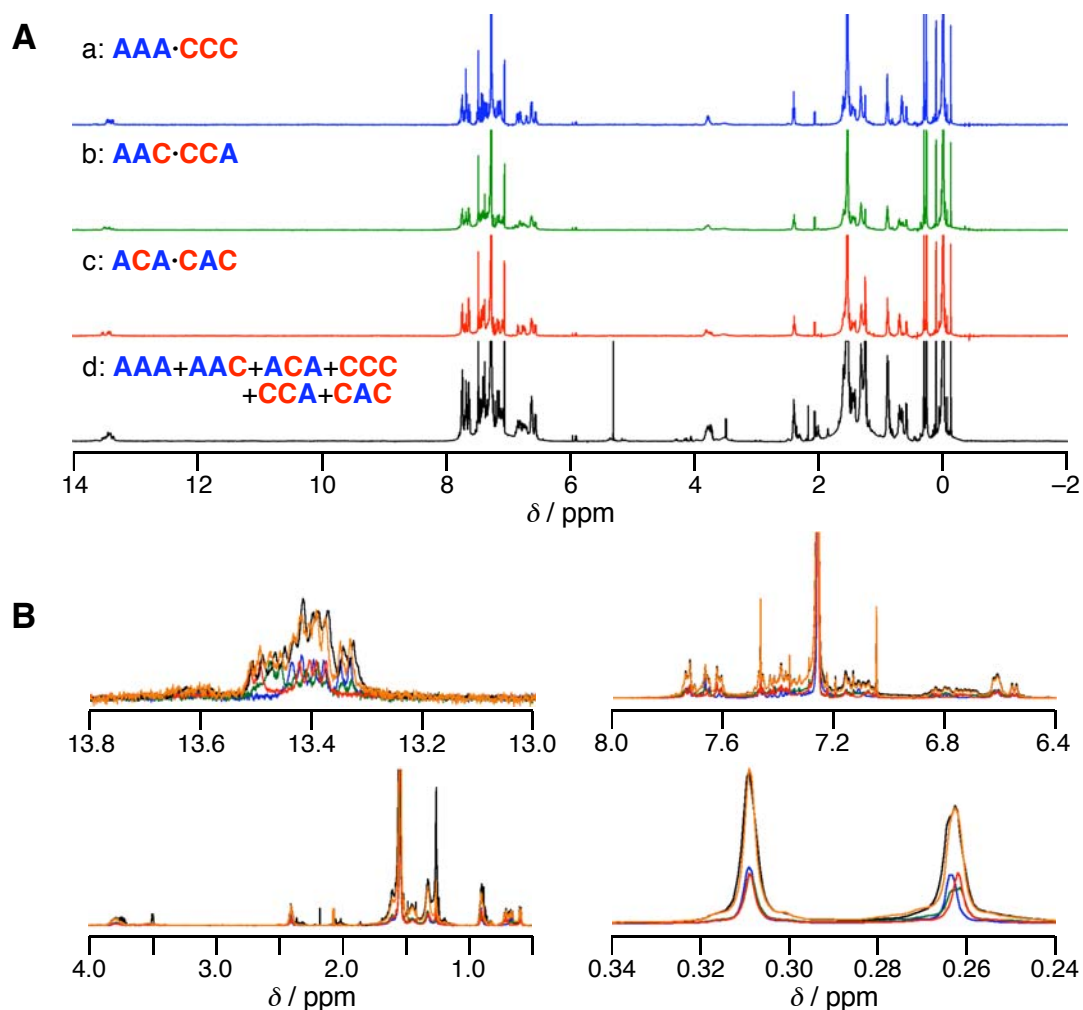

**Figure S5.** (A)  $^1\text{H}$  NMR spectra of **AAA·CCC** (a, blue), **AAC·CCA** (b, green), **ACA·CAC** (c, red), and an equimolar mixture of **AAA**, **AAC**, **ACA**, **CCC**, **CCA**, and **CAC** (d, the sample had been allowed to stand for 36 h, black) in  $\text{CDCl}_3$  (17  $\mu\text{M}$ , 25  $^\circ\text{C}$ ). (B) Partial  $^1\text{H}$  NMR spectra of a (blue), b (green), c (red), and d (black), and that simulated for an equimolar mixture of separately prepared **AAA·CCC**, **AAC·CCA**, and **ACA·CAC** (orange).

## 5. Sequence-Specific Binding of Trimers.

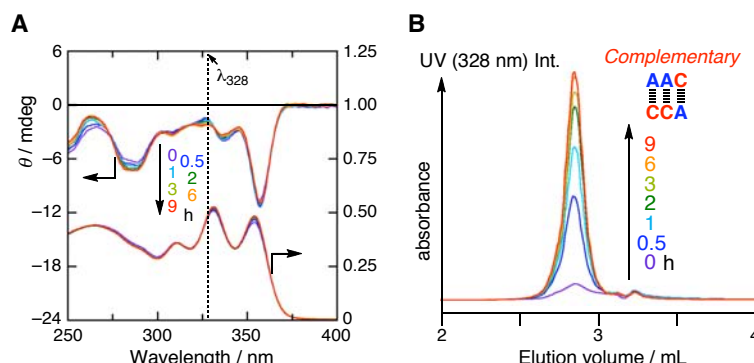

**Figure S6.** (A) Time dependent CD and absorption spectral changes of an equimolar mixture of **AAA**, **AAC**, **ACA**, and **CCA** (**CCA** was added 12 h after **AAA**, **AAC**, and **ACA** were mixed in  $\text{CHCl}_3$ ) 0–9 h after mixing in  $\text{CHCl}_3$  (10  $\mu\text{M}$ ) measured in a 1.0-mm quartz cell at 25 °C. (B) Changes in the HPLC chromatograms of an equimolar mixture of **AAA**, **AAC**, **ACA**, and **CCA** 0–9 h after mixing in  $\text{CHCl}_3$  at 25 °C (column: TSKgel Silica-60 (Tosoh,  $\phi$  0.46 x 25 cm); eluent:  $\text{CHCl}_3$ /hexane (1/1, v/v), 1.0 mL/min).

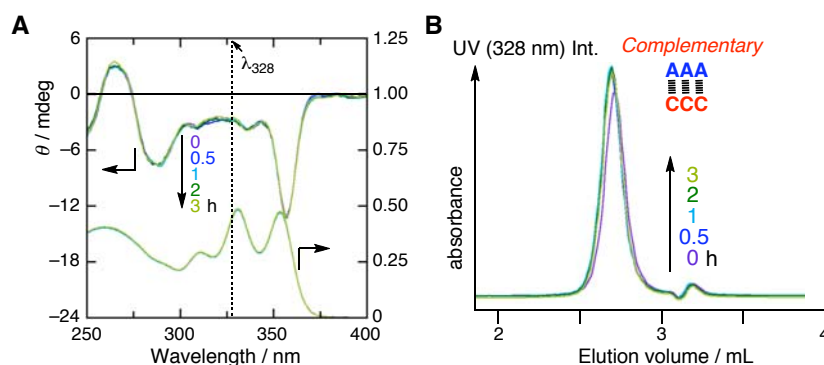

**Figure S7.** (A) Time dependent CD and absorption spectral changes of an equimolar mixture of **AAA**, **CAC**, **CCA**, and **CCC** (**CCC** was added 12 h after **AAA**, **CAC**, and **CCA** were mixed in  $\text{CHCl}_3$ ) 0–3 h after mixing in  $\text{CHCl}_3$  (10  $\mu\text{M}$ ) measured in a 1.0-mm quartz cell at 25 °C. (B) Changes in the HPLC chromatograms of an equimolar mixture of **AAA**, **CAC**, **CCA**, and **CCC** 0–3 h after mixing in  $\text{CHCl}_3$  at 25 °C (column: TSKgel Silica-60 (Tosoh,  $\phi$  0.46 x 25 cm); eluent:  $\text{CHCl}_3$ /hexane (1/1, v/v), 1.0 mL/min).

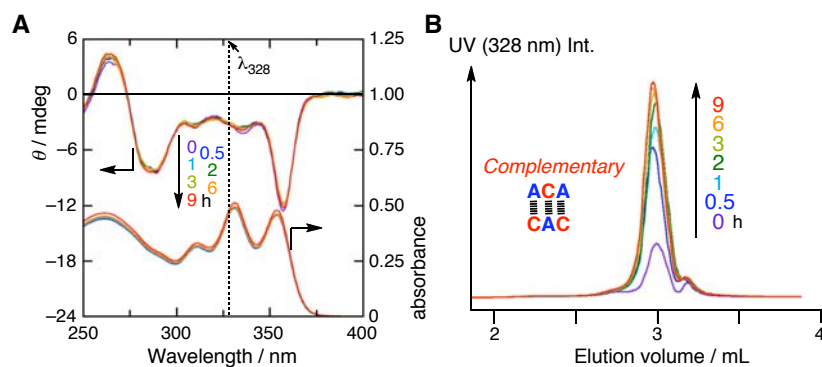

**Figure S8.** (A) Time dependent CD and absorption spectral changes of an equimolar mixture of **ACA**, **CAC**, **CCA**, and **CCC** (**ACA** was added 12 h after **CAC**, **CCA**, and **CCC** were mixed in  $\text{CHCl}_3$ ) 0–9 h after mixing in  $\text{CHCl}_3$  (10  $\mu\text{M}$ ) measured in a 1.0-mm quartz cell at 25 °C. (B) Changes in the HPLC chromatograms of an equimolar mixture **ACA**, **CAC**, **CCA**, and **CCC** 0–9 h after mixing in  $\text{CHCl}_3$  at 25 °C (column: TSKgel Silica-60 (Tosoh,  $\phi$  0.46 x 25 cm); eluent:  $\text{CHCl}_3$ /hexane = 1/1 (v/v), 1.0 mL/min).

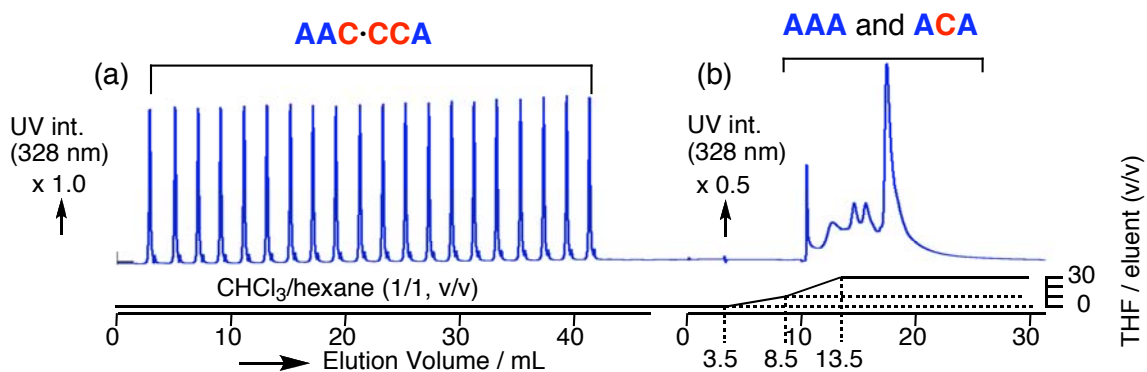

**Figure S9.** UV (328 nm) detected HPLC chromatogram for the isolation of **AAC·CCA** from an equimolar mixture of **AAA**, **AAC**, **ACA**, and **CCA**. (a) The sample was injected 20 times at regular intervals of 2 min, and the fractions containing **AAC·CCA** were collected with the eluent of  $\text{CHCl}_3/\text{hexane}$  (1/1, v/v). (b) The other components adsorbed on the stationary phase of the column were eluted after changing the eluent to that containing 30 vol% of THF.

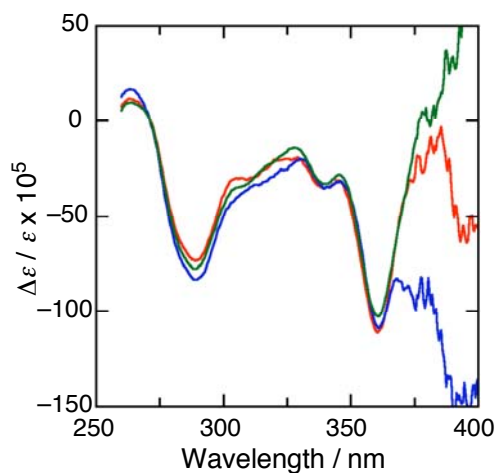

**Figure S10.** CD spectra ( $\Delta\epsilon/\epsilon$ ) of **AAC·CCA** ( $5.0 \times 10^{-5}$  M in  $\text{CHCl}_3$ , green), **AAC·CCA** isolated by HPLC from the mixture of **AAA**, **AAC**, **ACA**, and **CCA** in  $\text{CHCl}_3$  (red), and from the mixture of **AAC** and **CCA** in  $\text{CHCl}_3$  (blue).



## 6. Chain Length-Specific Double Helix Formation.

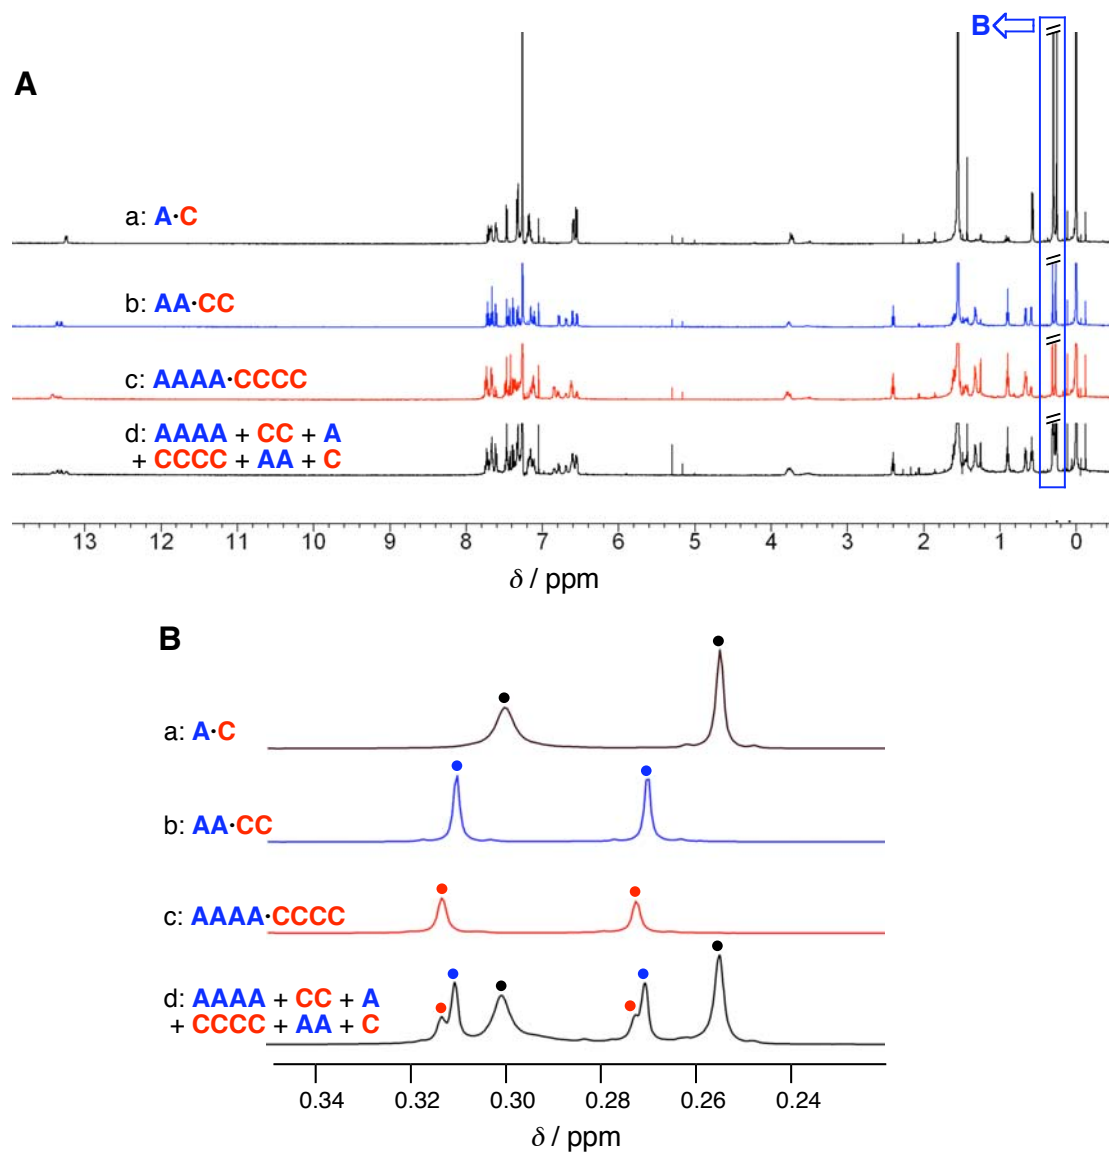

**Figure S11.** (A)  $^1\text{H}$  NMR spectra of **A·C** (0.1 mM) (a), **AA·CC** (0.05 mM) (b), **AAAA·CCCC** (0.025 mM) (c), and a mixture of **AAAA** (12.5  $\mu\text{M}$ ), **CC** (25  $\mu\text{M}$ ), **A** (50  $\mu\text{M}$ ), **CCCC** (12.5  $\mu\text{M}$ ), **AA** (25  $\mu\text{M}$ ), and **C** (50  $\mu\text{M}$ ) (d, after mixing in this order) in  $\text{CDCl}_3$  at 25  $^\circ\text{C}$ . (B) Partial  $^1\text{H}$  NMR spectra of the terminal trimethylsilyl region of (a), (b), (c), and (d).
